# Supplementary material for: Genomic sequence and analysis of a vaccinia virus isolate from a patient with a smallpox vaccine-related complication
Source: PubMed Central journal article supplement (PMC1635044; doi:10.1186/1743-422x-3-88), 2006-10-25
Supplement: 1743-422X-3-88-S1.pdf [file 1743-422X-3-88-S1.pdf]

| Predicted Function/Motif      | VACV-COP                         | VACV-DUKE |          |     |        |        | ACAM2000            |        |        | VACV-CLONE3      |     |        |
|-------------------------------|----------------------------------|-----------|----------|-----|--------|--------|---------------------|--------|--------|------------------|-----|--------|
|                               |                                  | Ortholog  | Fragment | ORF | Length | Start  | Stop                | ORF    | Length | %Ident           | ORF | Length |
| Chemokine binding protein     | C23L                             |           | 1        | 241 | 2847   | 3572   | 1                   | 241    | 100    | 1                | 241 | 100    |
|                               | B29R                             |           | 225      | 241 | 196389 | 197114 | 241                 | 241    | 100    | 241              | 241 | 100    |
| TNF-alpha receptor            | n/a                              | yes       | 2        | 146 | 3976   | 4416   | 2 <sup>1</sup>      | 146    | 100    | 2 <sup>1</sup>   | 146 | 100    |
|                               | n/a                              | yes       | 224      | 146 | 195545 | 195985 | 240 <sup>1</sup>    | 146    | 100    | 240 <sup>1</sup> | 146 | 100    |
|                               | C22L                             | yes       | 3        | 122 | 4299   | 4667   | 3 <sup>1</sup>      | 122    | 99.18  | 3 <sup>1</sup>   | 122 | 99.18  |
|                               | B28R                             | yes       | 223      | 122 | 195294 | 195662 | 239 <sup>1</sup>    | 122    | 99.18  | 239 <sup>1</sup> | 122 | 99.18  |
| Ankyrin (Cop-B25R)            | C21L                             | yes       | 4        | 111 | 5031   | 5366   | 4 <sup>1</sup>      | 111    | 100    | 4 <sup>1</sup>   | 111 | 100    |
|                               | B27R                             | yes       | 222      | 111 | 194595 | 194930 | 238 <sup>1</sup>    | 111    | 100    | 238 <sup>1</sup> | 111 | 100    |
|                               | C20L                             | yes       | 5        | 77  | 5299   | 5532   | 5 <sup>1</sup>      | 128    | 100    | 5 <sup>1</sup>   | 77  | 100    |
|                               | B26R                             | yes       | 221      | 77  | 194429 | 194662 | 237 <sup>1</sup>    | 128    | 100    | 237 <sup>1</sup> | 77  | 100    |
|                               | C19L                             | yes       | 6        | 146 | 5935   | 6375   | 6 <sup>1</sup>      | 137    | 90.41  | 6 <sup>1</sup>   | 149 | 97.99  |
|                               | B25R                             | yes       | 220      | 146 | 193586 | 194026 | 236 <sup>1</sup>    | 137    | 90.41  | 236 <sup>1</sup> | 149 | 97.99  |
| Ankyrin (CPXV-008)            | C18L                             | yes       | 7        | 198 | 6617   | 7213   | 7 <sup>1</sup>      | 198    | 100    | 7 <sup>1</sup>   | 198 | 99.49  |
|                               | B24R                             | yes       | 219      | 198 | 192748 | 193344 | 235 <sup>1</sup>    | 198    | 100    | 235 <sup>1</sup> | 198 | 99.49  |
|                               | C17L                             | yes       | 8        | 382 | 7307   | 8455   | 8 <sup>1</sup>      | 382    | 99.74  | 8 <sup>1</sup>   | 382 | 99.21  |
|                               | B23R                             | yes       | 218      | 382 | 191506 | 192654 | 234 <sup>1</sup>    | 382    | 99.74  | 234 <sup>1</sup> | 382 | 99.21  |
| Unknown (Cop-B22R)            | C16L                             |           | 9        | 181 | 8502   | 9047   | 9                   | 181    | 100    | 9                | 181 | 100    |
|                               | B22R                             |           | 217      | 181 | 190914 | 191459 | 233                 | 181    | 100    | 233              | 181 | 100    |
| Unknown (Cop-C15L)            | C15L                             | yes       | 10       | 91  | 9383   | 9658   | 10                  | 89     | 91.21  | 10               | 91  | 100    |
|                               | B21R                             | yes       | 216      | 91  | 190303 | 190578 | 232                 | 89     | 91.21  | 232              | 91  | 100    |
| Surface glycoprotein          | n/a                              | yes       | 11       | 51  | 10069  | 10224  | 11 <sup>1</sup>     | 51     | 100    | 11 <sup>1</sup>  | 51  | 100    |
|                               | n/a                              | yes       | 215      | 51  | 189737 | 189892 | 231 <sup>1</sup>    | 51     | 100    | 231 <sup>1</sup> | 51  | 100    |
| Unknown (Cop-C14L)            | C14L                             |           | 12       | 190 | 10476  | 11048  | 12 <sup>1</sup>     | 190    | 100    | 12 <sup>1</sup>  | 190 | 99.47  |
|                               | n/a                              |           | 214      | 190 | 188913 | 189485 | 232 <sup>1</sup>    | 190    | 100    | 232 <sup>1</sup> | 190 | 99.47  |
| Serpin (SPI)                  | C12L                             |           | 13       | 309 | 11210  | 12139  | 13                  | 357    | 100    | 13               | 334 | 97.76  |
|                               | n/a                              |           | 213      | 357 | 187678 | 188751 | 229                 | 357    | 100    | 229              | 353 | 98.32  |
| Growth factor                 | C11R                             |           | 14       | 141 | 12706  | 13131  | 14/228              | 139    | 97.87  | 14               | 140 | 97.87  |
| IL-1 Receptor antagonist      | C10L                             |           | 15       | 331 | 13286  | 14281  | 15/227              | 331    | 98.79  | 15               | 331 | 99.7   |
| RING finger/apoptosis         | n/a                              | yes       | 16       | 44  | 14794  | 14928  | 16 <sup>1</sup>     | 44     | 100    | 16 <sup>1</sup>  | 44  | 100    |
|                               | n/a                              | yes       | 17       | 83  | 14889  | 15140  | 17/226 <sup>1</sup> | 83     | 97.59  | 17 <sup>1</sup>  | 83  | 97.59  |
|                               | n/a                              | yes       | 18       | 62  | 15285  | 15473  | 18/225 <sup>1</sup> | 62     | 98.39  | 18 <sup>1</sup>  | 62  | 96.77  |
| IL-18 BP (C12L)               | n/a                              |           | 19       | 124 | 15646  | 16020  | 19/224              | 124    | 95.16  | 19               | 124 | 89.52  |
| Host Range (Bang-D8L)         | n/a                              | yes       | 20       | 90  | 16079  | 16351  | 20/223 <sup>1</sup> | 90     | 100    | 20 <sup>1</sup>  | 90  | 100    |
|                               | n/a                              | yes       | 21       | 142 | 16364  | 16792  | 21/222 <sup>1</sup> | 142    | 99.3   | 21 <sup>1</sup>  | 142 | 99.3   |
|                               | n/a                              | yes       | 22       | 135 | 16881  | 17288  | 22/221 <sup>1</sup> | 135    | 99.26  | 22 <sup>1</sup>  | 135 | 99.26  |
|                               | n/a                              | yes       | 23       | 77  | 17537  | 17770  | 23/220 <sup>1</sup> | 77     | 100    | 23 <sup>1</sup>  | 77  | 100    |
|                               | n/a                              | yes       | 24       | 71  | 17792  | 18007  | 24/219 <sup>1</sup> | 71     | 98.59  | 24 <sup>1</sup>  | 71  | 98.59  |
|                               | Retroviral pseudoprotease (ORFV) | n/a       |          | 25  | 55     | 18111  | 18278               | 25/218 | 55     | 100              | 25  | 56     |
| Ankyrin (Cop-C9L)             | C9L                              |           | 26       | 634 | 18451  | 20355  | 26                  | 634    | 99.68  | 26               | 634 | 100    |
|                               |                                  |           |          |     |        |        | 217 <sup>1</sup>    | 91     |        |                  |     |        |
| Unknown (Cop-C8L)             | C8L                              |           | 27       | 177 | 20398  | 20931  | 27                  | 177    | 100    | 27               | 177 | 93.22  |
| Host range virulence factor   | C7L                              |           | 28       | 150 | 21003  | 21455  | 28                  | 150    | 100    | 28               | 150 | 100    |
| Unknown (Cop-C6L)             | C6L                              |           | 29       | 151 | 21682  | 22137  | 29                  | 151    | 100    | 29               | 151 | 100    |
| Unknown (Cop-C5L)             | C5L                              |           | 30       | 201 | 22256  | 22861  | 30                  | 204    | 100    | 30               | 204 | 100    |
| IL-1 Receptor antagonist      | C4L                              | yes       | 31       | 62  | 22933  | 23121  | 31 <sup>1</sup>     | 62     | 98.39  | 31 <sup>1</sup>  | 62  | 98.39  |
|                               | C4L                              | yes       | 32       | 76  | 23108  | 23338  | 32 <sup>1</sup>     | 136    | 94.74  | 32 <sup>1</sup>  | 136 | 94.74  |
|                               | C4L                              | yes       | 33       | 59  | 23662  | 23841  | 33 <sup>1</sup>     | 59     | 98.31  | 33 <sup>1</sup>  | 59  | 96.61  |
| Complement binding (secreted) | C3L                              |           | 34       | 263 | 23908  | 24699  | 34                  | 263    | 99.24  | 34               | 261 | 98.48  |

| Predicted Function/Motif                       | VACV-COP | VACV-DUKE |          |      |        |       | ACAM2000        |      |        | VACV-CLONE3     |      |        |
|------------------------------------------------|----------|-----------|----------|------|--------|-------|-----------------|------|--------|-----------------|------|--------|
|                                                |          | Ortholog  | Fragment | ORF  | Length | Start | Stop            | ORF  | Length | %Ident          | ORF  | Length |
| Kelch-like (Cop-C2L)                           | C2L      |           | 35       | 506  | 24766  | 26286 | 35              | 506  | 99.8   | 35              | 506  | 99.8   |
| Unknown (Cop-C1L)                              | C1L      |           | 36       | 224  | 26356  | 27030 | 36              | 224  | 100    | 36              | 224  | 99.55  |
| Virokine (Cop-N1L)                             | N1L      |           | 37       | 117  | 27017  | 27370 | 37              | 117  | 100    | 37              | 117  | 100    |
| Alpha-amanitin sensitivity                     | N2L      |           | 38       | 175  | 27489  | 28016 | 38              | 175  | 98.86  | 38              | 175  | 99.43  |
| Ankyrin (Cop-M1L)                              | M1L      |           | 39       | 469  | 28058  | 29467 | 41              | 469  | 100    | 39 <sup>1</sup> | 72   | 100    |
|                                                |          |           | 39       | 469  | 28058  | 29467 | 41              | 469  | 100    | 40 <sup>1</sup> | 214  | 99.51  |
|                                                |          |           | 39       | 469  | 28058  | 29467 | 41              | 469  | 100    | 41 <sup>1</sup> | 159  | 97.00  |
| Unknown (Cop-M2L)                              | M2L      |           | 40       | 220  | 29445  | 30107 | 42              | 220  | 99.09  | 42              | 220  | 99.09  |
| Ankyrin/Host range (Cop-K1L)                   | K1L      |           | 41       | 284  | 30242  | 31096 | 43              | 284  | 100    | 43              | 284  | 100    |
| Serpin (SPI)                                   | K2L      |           | 42       | 369  | 31318  | 32427 | 44              | 369  | 100    | 44              | 369  | 99.73  |
| INF resistance (PKR inhibitor)                 | K3L      |           | 43       | 88   | 32477  | 32743 | 45              | 88   | 100    | 45              | 88   | 100    |
| Phospholipase D-like (Cop-K4L)                 | K4L      |           | 44       | 424  | 32795  | 34069 | 46              | 424  | 100    | 46              | 424  | 100    |
| Putative monoglyceride lipase                  | K5L      | yes       | 45       | 171  | 34096  | 34611 | 47 <sup>1</sup> | 136  | 99.06  | 47 <sup>1</sup> | 121  | 99.06  |
|                                                | K6L      | yes       | 46       | 81   | 34633  | 34878 | 48 <sup>1</sup> | 81   | 100    | 48 <sup>1</sup> | 110  | 100    |
| Unknown (Cop-K7R)                              | K7R      |           | 47       | 149  | 35017  | 35466 | 49              | 149  | 100    | 49              | 149  | 100    |
| Apoptosis inhibitor (mitochondrial-associated) | F1L      |           | 48       | 226  | 35531  | 36211 | 50              | 226  | 99.56  | 50              | 226  | 99.56  |
| dUTPase                                        | F2L      |           | 49       | 147  | 36223  | 36666 | 51              | 147  | 100    | 51              | 147  | 100    |
| Kelch-like (Cop-F3L)                           | F3L      |           | 50       | 480  | 36690  | 38132 | 52              | 480  | 100    | 52              | 480  | 99.79  |
| Ribonucleotide Reductase small subunit         | F4L      |           | 51       | 319  | 38143  | 39102 | 53              | 319  | 100    | 53              | 319  | 100    |
| 36kDa major membrane protein (Cop-F5L)         | F5L      |           | 52       | 321  | 39134  | 40099 | 54              | 321  | 99.38  | 54              | 321  | 99.69  |
| Unknown (Cop-F6L)                              | F6L      |           | 53       | 74   | 40129  | 40353 | 55              | 74   | 100    | 55              | 74   | 100    |
| Unknown (Cop-F7L)                              | F7L      |           | 54       | 80   | 40369  | 40611 | 56              | 80   | 100    | 56              | 80   | 100    |
| Cytoplasmic protein (Cop-F8L)                  | F8L      |           | 55       | 65   | 40755  | 40952 | 57              | 65   | 98.46  | 57              | 65   | 100    |
| Putative MP (Cop-F9L)                          | F9L      |           | 56       | 212  | 41012  | 41650 | 58              | 212  | 100    | 58              | 212  | 99.53  |
| Ser/Thr kinase Morph (Cop-F10L)                | F10L     |           | 57       | 439  | 41637  | 42956 | 59              | 439  | 99.77  | 59              | 439  | 99.77  |
| Unknown (Cop-F11L)                             | F11L     |           | 58       | 348  | 42979  | 44025 | 60              | 348  | 100    | 60              | 348  | 100    |
| Actin tail/microtubule                         | F12L     |           | 59       | 635  | 44068  | 45975 | 61              | 635  | 99.69  | 61              | 635  | 99.37  |
| Phospholipase EEV (Cop-F13L)                   | F13L     |           | 60       | 372  | 46009  | 47127 | 62              | 372  | 100    | 62              | 372  | 100    |
| Unknown (Cop-F14L)                             | F14L     |           | 61       | 73   | 47145  | 47366 | 63              | 73   | 100    | 63              | 73   | 98.63  |
| Unknown (Cop-F15L)                             | F15L     |           | 62       | 158  | 47638  | 48114 | 64              | 158  | 99.37  | 64              | 158  | 99.37  |
| Unknown (Cop-F16L)                             | F16L     |           | 63       | 231  | 48121  | 48816 | 65              | 231  | 99.13  | 65              | 231  | 100    |
| DNA-binding phosphoprotein (Cop-F17R)          | F17R     |           | 64       | 101  | 48879  | 49184 | 66              | 101  | 99.01  | 66              | 101  | 100    |
| Poly (A) polymerase-large (VP55)               | E1L      |           | 65       | 479  | 49181  | 50620 | 67              | 479  | 99.79  | 67              | 479  | 100    |
| Unknown (Cop-E2L)                              | E2L      |           | 66       | 737  | 50617  | 52830 | 68              | 737  | 99.86  | 68              | 737  | 100    |
| IFN resistance/PKR inhibitor (Z-DNA binding)   | E3L      |           | 67       | 190  | 52931  | 53503 | 69              | 190  | 100    | 69              | 190  | 96.84  |
| RNA pol (RPO30)                                | E4L      |           | 68       | 259  | 53559  | 54338 | 70              | 259  | 100    | 70              | 259  | 100    |
| Virosome component                             | E5R      |           | 69       | 331  | 54415  | 55410 | 71 <sup>1</sup> | 189  | 99.46  | 71 <sup>1</sup> | 189  | 99.46  |
|                                                |          |           | 69       | 331  | 54415  | 55410 | 72 <sup>1</sup> | 149  | 99.46  | 72 <sup>1</sup> | 149  | 99.46  |
| Unknown (Cop-E6R)                              | E6R      |           | 70       | 567  | 55547  | 57250 | 73              | 567  | 99.82  | 73              | 567  | 99.29  |
| Soluble/Myristyl EEV (Cop-E7R)                 | E7R      |           | 71       | 166  | 57332  | 57832 | 74              | 166  | 100    | 74              | 166  | 100    |
| ER-localized MP(Cop-E8R)                       | E8R      |           | 72       | 273  | 57957  | 58778 | 75              | 273  | 100    | 75              | 273  | 100    |
| DNA pol                                        | E9L      |           | 73       | 1005 | 58785  | 61802 | 76              | 1005 | 99.8   | 76              | 1005 | 100    |
| Redox/EVR-1 Morph                              | E10R     |           | 74       | 95   | 61834  | 62121 | 77              | 95   | 100    | 77              | 95   | 100    |

| Predicted Function/Motif                              | VACV-COP<br>Ortholog | VACV-DUKE |     |        |        |        | ACAM2000 |        |        | VACV-CLONE3 |        |        |
|-------------------------------------------------------|----------------------|-----------|-----|--------|--------|--------|----------|--------|--------|-------------|--------|--------|
|                                                       |                      | Fragment  | ORF | Length | Start  | Stop   | ORF      | Length | %Ident | ORF         | Length | %Ident |
| Virion core ES                                        | E11L                 |           | 75  | 129    | 62116  | 62505  | 78       | 129    | 100    | 78          | 129    | 100    |
| Unknown (Cop-O1L)                                     | O1L                  |           | 76  | 666    | 62492  | 64492  | 79       | 666    | 99.55  | 79          | 666    | 99.85  |
| Glutaredoxin 1 (Cop-O2L)                              | O2L                  |           | 77  | 108    | 64532  | 64858  | 80       | 108    | 100    | 80          | 108    | 100    |
| DNA-binding protein (Cop-I1L)                         | I1L                  |           | 78  | 312    | 65004  | 65942  | 81       | 312    | 99.68  | 81          | 312    | 99.36  |
| Unknown (Cop-I2L)                                     | I2L                  |           | 79  | 73     | 65949  | 66170  | 82       | 73     | 95.89  | 82          | 73     | 97.26  |
| DNA-binding phosphoprotein (Cop-I3L)                  | I3L                  |           | 80  | 269    | 66171  | 66980  | 83       | 269    | 100    | 83          | 269    | 100    |
| Ribonucleotide Reductase large subunit                | I4L                  |           | 81  | 771    | 67063  | 69378  | 84       | 771    | 100    | 84          | 771    | 99.87  |
| IMV protein VP13                                      | I5L                  |           | 82  | 79     | 69405  | 69644  | 85       | 79     | 100    | 85          | 79     | 100    |
| Telomere-Binding protein                              | I6L                  |           | 83  | 382    | 69663  | 70811  | 86       | 382    | 99.74  | 86          | 382    | 99.74  |
| Virion Core Protease                                  | I7L                  |           | 84  | 423    | 70804  | 72075  | 87       | 423    | 100    | 87          | 423    | 100    |
| RNA helicase/NPH-II                                   | I8R                  |           | 85  | 676    | 72081  | 74111  | 88       | 676    | 99.7   | 88          | 676    | 99.85  |
| Predicted metallo-protease (Cop-G1L)                  | G1L                  |           | 86  | 591    | 74115  | 75890  | 89       | 591    | 100    | 89          | 591    | 100    |
| VLTF (late transcription elongation factor - Cop-G2R) | G2R                  |           | 87  | 220    | 76216  | 76878  | 91       | 220    | 99.09  | 91          | 220    | 99.09  |
| Unknown (Cop-G3L)                                     | G3L                  |           | 88  | 111    | 75887  | 76222  | 90       | 111    | 100    | 90          | 111    | 100    |
| Glutaredoxin 2 (Cop-G4L)                              | G4R                  |           | 89  | 124    | 76848  | 77222  | 92       | 124    | 100    | 92          | 124    | 100    |
| Unknown (Cop-G5R)                                     | G5R                  |           | 90  | 434    | 77225  | 78529  | 93       | 434    | 98.62  | 93          | 434    | 98.62  |
| RNA pol (RPO7)                                        | G5.5R                |           | 91  | 63     | 78537  | 78728  | 94       | 63     | 100    | 94          | 63     | 100    |
| Unknown (Cop-G6R)                                     | G6R                  |           | 92  | 165    | 78730  | 79227  | 95       | 165    | 97.58  | 95          | 165    | 96.97  |
| Structural protein (Cop-G7L)                          | G7L                  |           | 93  | 371    | 79192  | 80307  | 96       | 371    | 100    | 96          | 371    | 100    |
| VLTF-1 (Cop-G8R)                                      | G8R                  |           | 94  | 260    | 80338  | 81120  | 97       | 260    | 100    | 97          | 260    | 100    |
| Myristylated protein (Cop-G9R)                        | G9R                  |           | 95  | 340    | 81140  | 82162  | 98       | 340    | 100    | 98          | 340    | 100    |
| Myristylated MP IMV (Cop-L1R)                         | L1R                  |           | 96  | 250    | 82163  | 82915  | 99       | 250    | 100    | 99          | 250    | 100    |
| Unknown (Cop-L2R)                                     | L2R                  |           | 97  | 85     | 82947  | 83204  | 100      | 85     | 100    | 100         | 85     | 100    |
| Unknown (Cop-L3L)                                     | L3L                  |           | 98  | 350    | 83194  | 84246  | 101      | 350    | 100    | 101         | 350    | 100    |
| Core package/transcription                            | L4R                  |           | 99  | 251    | 84271  | 85026  | 102      | 251    | 100    | 102         | 251    | 99.6   |
| Putative MP (Cop-L5R)                                 | L5R                  |           | 100 | 128    | 85036  | 85422  | 103      | 128    | 100    | 103         | 128    | 100    |
| Virion (Cop-J1R)                                      | J1R                  |           | 101 | 153    | 85379  | 85840  | 104      | 153    | 98.69  | 104         | 153    | 98.69  |
| Thymidine kinase                                      | J2R                  |           | 102 | 177    | 85856  | 86389  | 105      | 177    | 100    | 105         | 177    | 100    |
| Poly(A) polymerase-small (VP39)                       | J3R                  |           | 103 | 333    | 86455  | 87456  | 106      | 333    | 100    | 106         | 333    | 100    |
| RNA pol (RPO22)                                       | J4R                  |           | 104 | 185    | 87371  | 87928  | 107      | 185    | 100    | 107         | 185    | 100    |
| Late Es MP (Cop-J5L)                                  | J5L                  |           | 105 | 133    | 87990  | 88391  | 108      | 133    | 100    | 108         | 133    | 100    |
| RNA pol (RPO147)                                      | J6R                  |           | 106 | 1286   | 88498  | 92358  | 109      | 1286   | 99.92  | 109         | 1286   | 99.92  |
| Tyr/Ser phosphatase                                   | H1L                  |           | 107 | 171    | 92355  | 92870  | 110      | 171    | 100    | 110         | 171    | 100    |
| component of fusion complex                           | H2R                  |           | 108 | 189    | 92884  | 93453  | 111      | 189    | 100    | 111         | 189    | 100    |
| IMV morphogenesis                                     | H3L                  |           | 109 | 324    | 93456  | 94430  | 112      | 324    | 100    | 112         | 318    | 98.15  |
| RAP94 (RNA pol assoc protein)                         | H4L                  |           | 110 | 795    | 94431  | 96818  | 113      | 795    | 99.87  | 113         | 795    | 99.87  |
| VLTF-4 (late transcription factor 4)                  | H5R                  |           | 111 | 203    | 97004  | 97615  | 114      | 203    | 100    | 114         | 203    | 100    |
| Topoisomerase type I                                  | H6R                  |           | 112 | 314    | 97616  | 98560  | 115      | 314    | 100    | 115         | 314    | 100    |
| Unknown (Cop-H7R)                                     | H7R                  |           | 113 | 146    | 98597  | 99037  | 116      | 146    | 97.95  | 116         | 146    | 98.63  |
| Large capping enzyme                                  | D1R                  |           | 114 | 844    | 99081  | 101615 | 117      | 844    | 99.88  | 117         | 844    | 100    |
| Virion Core (Cop-D2L)                                 | D2L                  |           | 115 | 146    | 101574 | 102014 | 118      | 146    | 100    | 118         | 146    | 100    |
| Virion core (Cop-D3R)                                 | D3R                  |           | 116 | 237    | 102007 | 102720 | 119      | 237    | 100    | 119         | 237    | 99.58  |
| Uracil-DNA glycosylase                                | D4R                  |           | 117 | 218    | 102720 | 103376 | 120      | 218    | 100    | 120         | 218    | 100    |
| NTPase, DNA replication                               | D5R                  |           | 118 | 785    | 103408 | 105765 | 121      | 785    | 100    | 121         | 785    | 100    |
| Morph, VETF-s (early transcription factor small)      | D6R                  |           | 119 | 637    | 105806 | 107719 | 122      | 637    | 100    | 122         | 637    | 100    |

| Predicted Function/Motif                               | VACV-COP          | VACV-DUKE |          |     |        |        | ACAM2000 |                  |        | VACV-CLONE3 |                  |        |        |
|--------------------------------------------------------|-------------------|-----------|----------|-----|--------|--------|----------|------------------|--------|-------------|------------------|--------|--------|
|                                                        |                   | Ortholog  | Fragment | ORF | Length | Start  | Stop     | ORF              | Length | %Ident      | ORF              | Length | %Ident |
| RNA pol 18(RPO18)                                      | D7R               |           |          | 120 | 161    | 107746 | 108231   | 123              | 161    | 100         | 123              | 161    | 100    |
| Carbonic anhydrase/Virion                              | D8L               |           |          | 121 | 304    | 108194 | 109108   | 124              | 304    | 99.34       | 124              | 304    | 99.34  |
| mutT motif/NTP-PPH                                     | D9R               |           |          | 122 | 213    | 109150 | 109791   | 125              | 213    | 100         | 125              | 213    | 100    |
| mutT motif/NPH-PPH/down regulator                      | D10R              |           |          | 123 | 248    | 109788 | 110534   | 126              | 248    | 100         | 126              | 248    | 100    |
| NPH-I, virion                                          | D11L              |           |          | 124 | 631    | 110535 | 112430   | 127              | 631    | 100         | 127              | 631    | 100    |
| Small capping enzyme                                   | D12L              |           |          | 125 | 287    | 112465 | 113328   | 128              | 287    | 100         | 128              | 287    | 100    |
| Rifampicin resistance MP                               | D13L              |           |          | 126 | 551    | 113359 | 115014   | 129              | 551    | 100         | 129              | 551    | 100    |
| VLTF-2 (late transcription factor 2)                   | A1L               |           |          | 127 | 150    | 115038 | 115490   | 130              | 150    | 100         | 130              | 150    | 100    |
| VLTF-3 (late transcription factor 3)                   | A2L               |           |          | 128 | 224    | 115511 | 116185   | 131              | 224    | 100         | 131              | 224    | 100    |
| Thioredoxin-like (Cop-A2.5L)                           | A2.5L             |           |          | 129 | 76     | 116182 | 116412   | 132              | 76     | 100         | 132              | 76     | 100    |
| P4b precursor                                          | A3L               |           |          | 130 | 644    | 116427 | 118361   | 133              | 644    | 99.22       | 133              | 644    | 99.38  |
| Core protein (Cop-A4L)                                 | A4L               |           |          | 131 | 281    | 118414 | 119259   | 134              | 281    | 100         | 134              | 281    | 100    |
| RNA pol 19 (RPO19)                                     | A5R               |           |          | 132 | 164    | 119297 | 119791   | 135              | 164    | 100         | 135              | 164    | 100    |
| Unknown (Cop-A6L)                                      | A6L               |           |          | 133 | 372    | 119788 | 120906   | 136              | 372    | 100         | 136              | 372    | 99.46  |
| VETF-L (early transcription factor large)              | A7L               |           |          | 134 | 710    | 120930 | 123062   | 137              | 710    | 99.72       | 137              | 710    | 99.86  |
| VITF-3 (intermediate transcription factor 3-Cop-A8R)   | A8R               |           |          | 135 | 288    | 123116 | 123982   | 138              | 288    | 100         | 138              | 288    | 100    |
| Membrane protein (Cop-A9L)                             | A9L               |           |          | 136 | 108    | 123975 | 124301   | 139              | 108    | 100         | 139              | 108    | 100    |
| P4a precursor                                          | A10L              |           |          | 137 | 891    | 124302 | 126977   | 140              | 891    | 99.89       | 140              | 891    | 99.55  |
| Unknown (Cop-A11R)                                     | A11R              |           |          | 138 | 318    | 126992 | 127948   | 141              | 318    | 100         | 141              | 318    | 100    |
| Structural protein (Cop-A12L)                          | A12L              |           |          | 139 | 191    | 127950 | 128525   | 142              | 192    | 97.4        | 142              | 191    | 98.95  |
| Virion MP (Cop-A13L)                                   | A13L              |           |          | 140 | 68     | 128549 | 128755   | 143              | 70     | 95.71       | 143              | 70     | 97.14  |
| IMV PO4 MP (Cop-A14L)                                  | A14L              |           |          | 141 | 90     | 128863 | 129135   | 144              | 90     | 98.89       | 144              | 90     | 98.89  |
| IMV-MP/Virulence factor (Cop-A14.5L)                   | A14.5L            |           |          | 142 | 53     | 129152 | 129313   | 145              | 53     | 98.11       | 145              | 53     | 98.11  |
| Unknown (Cop-A15L)                                     | A15L              |           |          | 143 | 94     | 129303 | 129587   | 146              | 94     | 100         | 146              | 94     | 100    |
| Soluble/Myristylated (Cop-A16L)                        | A16L              |           |          | 144 | 377    | 129571 | 130704   | 147              | 378    | 99.21       | 147              | 378    | 99.47  |
| IMV MP PO4 (Cop-A17L)                                  | A17L              |           |          | 145 | 203    | 130707 | 131318   | 148              | 203    | 100         | 148              | 203    | 100    |
| DNA Helicase, transcription                            | A18R              |           |          | 146 | 493    | 131333 | 132814   | 149              | 493    | 99.8        | 149              | 493    | 100    |
| Unknown (Cop-A19L)                                     | A19L              |           |          | 147 | 77     | 132795 | 133028   | 150              | 77     | 100         | 150              | 77     | 100    |
| DNA Processivity factor                                | A20R              |           |          | 148 | 426    | 133381 | 134661   | 152              | 426    | 99.53       | 152              | 426    | 99.77  |
| Unknown (Cop-A21L)                                     | A21L              |           |          | 149 | 117    | 133029 | 133382   | 151              | 117    | 100         | 151              | 117    | 99.15  |
| Resolvase                                              | A22R              |           |          | 150 | 176    | 134624 | 135154   | 153              | 187    | 100         | 153              | 176    | 100    |
| VITF-3 (intermediate transcription factor 3, Cop-A23R) | A23R              |           |          | 151 | 382    | 135174 | 136322   | 154              | 382    | 100         | 154              | 382    | 100    |
| RNA pol 132(RPO132)                                    | A24R              |           |          | 152 | 1164   | 136319 | 139813   | 155              | 1164   | 99.74       | 155              | 1164   | 99.83  |
| CPV-ATI protein (Bang-A27L)                            | A25L              | yes       |          | 153 | 65     | 139818 | 140015   | 156 <sup>1</sup> | 65     | 100         | 156 <sup>1</sup> | 65     | 100    |
| CPV-ATI protein (Bang-A27L)                            | A26L <sup>2</sup> | yes       |          | 154 | 154    | 139984 | 140448   | 157 <sup>1</sup> | 154    | 100         | 157 <sup>1</sup> | 154    | 100    |
| CPV-ATI protein (Bang-A27L)                            | n/a               | yes       |          | 155 | 227    | 140720 | 141403   | 158 <sup>1</sup> | 227    | 100         | 158 <sup>1</sup> | 227    | 100    |
| CPV-ATI protein (Bang-A27L)                            | n/a               | yes       |          | 156 | 721    | 141363 | 143528   | 159 <sup>1</sup> | 721    | 99.86       | 159 <sup>1</sup> | 721    | 99.86  |
| IMV surface protein/ATI factor                         | A26L              |           |          | 157 | 500    | 143573 | 145075   | 160              | 500    | 99.2        | 160              | 500    | 99.4   |
| Fusion protein (Cop-A27L)                              | A27L              |           |          | 158 | 110    | 145125 | 145457   | 161              | 110    | 100         | 161              | 110    | 100    |
| IMV MP/Virus entry (Cop-A28L)                          | A28L              |           |          | 159 | 146    | 145458 | 145898   | 162              | 146    | 100         | 162              | 146    | 100    |
| RNA pol 35(RPO35)                                      | A29L              |           |          | 160 | 305    | 145899 | 146816   | 163              | 305    | 99.67       | 163              | 305    | 99.67  |

| Predicted Function/Motif                                  | VACV-COP | VACV-DUKE |          |     |        |        | ACAM2000           |     |        | VACV-CLONE3      |     |        |        |
|-----------------------------------------------------------|----------|-----------|----------|-----|--------|--------|--------------------|-----|--------|------------------|-----|--------|--------|
|                                                           |          | Ortholog  | Fragment | ORF | Length | Start  | Stop               | ORF | Length | %Ident           | ORF | Length | %Ident |
|                                                           |          |           |          |     |        |        |                    |     |        |                  |     |        |        |
| Virion Morph (Cop-A30L)                                   | A30L     |           | 161      | 77  | 146779 | 147012 | 164                | 77  | 100    | 164              | 77  | 100    |        |
| Unknown (Cop-A31R)                                        | A31R     |           | 162      | 124 | 147172 | 147546 | 165                | 124 | 100    | 165              | 124 | 100    |        |
| ATPase/DNA packaging protein                              | A32L     |           | 163      | 270 | 147513 | 148325 | 166                | 270 | 99.63  | 166              | 270 | 99.63  |        |
| EEV Glycoprotein (Cop-A33R)                               | A33R     |           | 164      | 185 | 148443 | 149000 | 167                | 185 | 100    | 167              | 185 | 100    |        |
| EEV Glycoprotein (Cop-A34R)                               | A34R     |           | 165      | 168 | 149024 | 149530 | 168                | 168 | 99.4   | 168              | 168 | 100    |        |
| Unknown (Cop-A35R)                                        | A35R     |           | 166      | 176 | 149574 | 150104 | 169                | 176 | 100    | 169              | 176 | 100    |        |
| IEV-specific (Cop-A36R)                                   | A36R     |           | 167      | 221 | 150171 | 150836 | 170                | 221 | 100    | 170              | 221 | 100    |        |
| Unknown (Cop-A37R)                                        | A37R     |           | 168      | 263 | 150903 | 151694 | 171                | 263 | 99.62  | 171              | 263 | 99.24  |        |
| Unknown (Gar-A43R)                                        | n/a      |           | 169      | 62  | 151784 | 151972 | 172                | 62  | 100    | 172              | 62  | 100    |        |
| CD47-like                                                 | A38L     |           | 170      | 277 | 151969 | 152802 | 173                | 277 | 100    | 173              | 277 | 100    |        |
| Semaphorin                                                | A39R     | yes       | 171      | 228 | 152819 | 153505 | 174 <sup>1</sup>   | 132 | 96.27  | 174 <sup>1</sup> | 134 | 99.25  |        |
|                                                           |          | yes       | 172      | 142 | 153589 | 154017 | 175 <sup>1</sup>   | 142 | 95.77  | 175 <sup>1</sup> | 142 | 99.3   |        |
| Lectin homolog                                            | A40R     |           | 173      | 168 | 154043 | 154549 | 176                | 168 | 98.21  | 176              | 168 | 99.4   |        |
| Unknown (Cop-A41L)                                        | A41L     |           | 174      | 219 | 154607 | 155266 | 177                | 219 | 99.09  | 177              | 219 | 100    |        |
| Profilin homolog (Cop-A42R)                               | A42R     |           | 175      | 133 | 155431 | 155832 | 178                | 133 | 100    | 178              | 133 | 100    |        |
| Membrane glycoprotein-class I                             | A43R     |           | 176      | 196 | 155870 | 156460 | 179                | 194 | 96.43  | 179              | 194 | 96.43  |        |
| Unknown (MVA-156R)                                        | n/a      |           | 177      | 78  | 156468 | 156704 | n/a                | n/a | n/a    | 180              | 78  | 100    |        |
| Hydroxysteroid dehydrogenase                              | A44L     |           | 178      | 346 | 156805 | 157845 | 181                | 346 | 99.42  | 181              | 346 | 99.42  |        |
| Superoxide dismutase-like                                 | A45R     |           | 179      | 125 | 157892 | 158269 | 182                | 125 | 99.2   | 182              | 125 | 100    |        |
| IL-1 signaling inhibitor (Cop-A46R)                       | A46R     |           | 180      | 240 | 158259 | 158981 | 183                | 240 | 100    | 183              | 240 | 100    |        |
| Unknown (Cop-A47L)                                        | A47L     |           | 181      | 244 | 159069 | 159803 | 184                | 244 | 99.59  | 184              | 244 | 99.18  |        |
| Thymidylate kinase                                        | A48R     |           | 182      | 227 | 159834 | 160517 | 185                | 204 | 100    | 185              | 227 | 100    |        |
| Unknown (Cop-A49R)                                        | A49R     |           | 183      | 162 | 160541 | 161029 | 186                | 162 | 100    | 186              | 162 | 98.77  |        |
| DNA ligase                                                | A50R     |           | 184      | 552 | 161061 | 162719 | 187                | 552 | 99.46  | 187              | 552 | 99.64  |        |
| Unknown (Cop-A51R)                                        | A51R     | yes       | 185      | 69  | 162765 | 162974 | 188 <sup>1</sup>   | 69  | 100    | 188              | 330 | 99.62  |        |
|                                                           |          | yes       | 186      | 266 | 162953 | 163753 | 188.1 <sup>1</sup> | 266 | 99.62  |                  |     |        |        |
| Intracellular TLR and IL-1 signaling inhibitor (Cop-A52R) | A52R     |           | 187      | 190 | 163823 | 164395 | 189                | 190 | 98.95  | 189              | 190 | 100    |        |
| TNF-alpha receptor                                        | A53R     |           | 188      | 185 | 164716 | 165273 | 190 <sup>1</sup>   | 132 | 96.21  | 190              | 186 | 96.77  |        |
| Kelch-like (Cop-A55R)                                     | A55R     |           | 189      | 564 | 165528 | 167222 | 191                | 564 | 99.11  | 191              | 564 | 99.29  |        |
| Hemagglutinin                                             | A56R     |           | 190      | 309 | 167272 | 168201 | 192                | 309 | 99.03  | 192              | 309 | 99.03  |        |
| Guanylate kinase                                          | A57R     |           | 191      | 151 | 168346 | 168801 | 193                | 151 | 100    | 193              | 151 | 100    |        |
| Ser/Thr Kinase (Cop-B1R)                                  | B1R      |           | 192      | 300 | 168952 | 169854 | 194                | 300 | 100    | 194              | 300 | 100    |        |
| Unknown (Cop-B2R)                                         | B2R      | yes       | 193      | 219 | 169944 | 170603 | 195 <sup>1</sup>   | 219 | 100    | 195 <sup>1</sup> | 219 | 99.09  |        |
| Unknown (Cop-B2R)                                         | B3R      | yes       | 194      | 266 | 170639 | 171439 | 196 <sup>1</sup>   | 124 | 99.19  | 196 <sup>1</sup> | 264 | 98.12  |        |
| Ankyrin (Cop-B4R)                                         | B4R      |           | 195      | 558 | 171669 | 173345 | 197                | 558 | 99.64  | 197              | 558 | 99.46  |        |
| Complement control/CD46/EEV                               | B5R      |           | 196      | 317 | 173448 | 174401 | 198                | 317 | 99.37  | 198              | 317 | 97.79  |        |
| Unknown (Cop-B6R)                                         | B6R      |           | 197      | 173 | 174483 | 175004 | 199                | 173 | 100    | 199              | 173 | 100    |        |
| Virulence, ER resident                                    | B7R      |           | 198      | 182 | 175042 | 175590 | 200                | 182 | 100    | 200              | 182 | 100    |        |
| IFN-gamma receptor                                        | B8R      |           | 199      | 272 | 175645 | 176463 | 201                | 272 | 99.63  | 201              | 272 | 99.63  |        |
| Virulence factor (Cop-B9R)                                | B9R      | yes       | 200      | 77  | 176550 | 176783 | 202 <sup>1</sup>   | 77  | 100    | 202 <sup>1</sup> | 77  | 100    |        |
| Kelch-like (CPV-GRI-B9R)                                  | B10R     | yes       | 201      | 166 | 176746 | 177246 | 203 <sup>1</sup>   | 166 | 100    | 203 <sup>1</sup> | 166 | 100    |        |
| Unknown (Cop-11R)                                         | B11R     |           | 202      | 91  | 177327 | 177602 | 204                | 72  | 98.59  | 204              | 92  | 98.9   |        |
| Ser/Thr Kinase (Cop-B12R)                                 | B12R     |           | 203      | 283 | 177669 | 178520 | 205                | 283 | 100    | 205              | 283 | 99.65  |        |
| Serpin (SPI)                                              | B13R     | yes       | 204      | 126 | 178619 | 178999 | 206 <sup>1</sup>   | 126 | 100    | 206 <sup>1</sup> | 126 | 100    |        |
|                                                           | B14R     | yes       | 205      | 222 | 178974 | 179642 | 207 <sup>1</sup>   | 222 | 97.3   | 207 <sup>1</sup> | 222 | 98.2   |        |
| Unknown (Cop-B22R)                                        | B15R     |           | 206      | 149 | 179717 | 180166 | 208                | 149 | 100    | 208              | 149 | 98.66  |        |

| Predicted Function/Motif | VACV-COP | VACV-DUKE |          |     |        |        | ACAM2000 |                  |        | VACV-CLONE3 |     |        |        |
|--------------------------|----------|-----------|----------|-----|--------|--------|----------|------------------|--------|-------------|-----|--------|--------|
|                          |          | Ortholog  | Fragment | ORF | Length | Start  | Stop     | ORF              | Length | %Ident      | ORF | Length | %Ident |
| IL-1 beta receptor       | B16R     |           |          | 207 | 326    | 180250 | 181230   | 209              | 326    | 98.77       | 209 | 326    | 97.55  |
| Unknown (Cop-B17L)       | B17L     |           |          | 208 | 340    | 181276 | 182298   | 210              | 340    | 98.53       | 210 | 340    | 98.82  |
| Ankyrin (Cop-B18R)       | B18R     |           |          | 209 | 574    | 182438 | 184162   | 211              | 574    | 98.61       | 211 | 574    | 99.83  |
| IFN-alpha/beta receptor  | B19R     |           |          | 210 | 351    | 184234 | 185289   | 212 <sup>1</sup> | 265    | 97.66       | 212 | 353    | 99.15  |
| Ankyrin (Bang-B18R)      | B20R     | yes       |          | 211 | 549    | 185361 | 187010   | n/a              |        |             | 213 | 791    | 97.43  |
| kelch-like (EV-M-167)    | n/a      |           |          | n/a |        |        |          | n/a              |        |             | 214 | 80     | -      |
|                          | n/a      |           |          | n/a |        |        |          | n/a              |        |             | 215 | 314    | -      |
|                          | n/a      | yes       |          | 212 | 134    | 187022 | 187426   | n/a              |        |             | 216 | 134    | 100    |

<sup>1</sup> Fragment in ACAM2000 or CLONE3 genomes. Fragments are defined as being truncated by one-third or the ORF is split into two or more pieces.

<sup>2</sup> The first 192 aa of COP-A26L is a fragment of IMV surface protein/ATI factor; aa 193 to 322 COP-A26L is a fragment of CPV-ATI protein (Bang-A27L)

n/a: no ORF in the corresponding region
